# Supplementary material for: Tumor Infiltrating Mast Cells (TIMs) Confers a Marked Survival Advantage in Nonmetastatic Clear-Cell Renal Cell Carcinoma
Source: Springer Nature journal article supplement (doi:10.1245/s10434-016-5702-5), 2016-11-28
Supplement: MOESM1 [file 11102388]

| **Table S1. Demographics and Disease Characteristics of Patients With localized ccRCC** | | | | | |
| --- | --- | --- | --- | --- | --- |
| **Characteristic** | **Training cohort** | |  | **Validation cohort** | |
| **Cases (%)** | **5 year cancer-specific survival** |  | **Cases (%)** | **5 year cancer-specific survival** |
| **All patients** | 474 (100%) | 89.6% |  | 188 (100%) | 92.0% |
| **Age at surgery, year** | 55 (55.1 ± 12.0) | |  | 53 (52.9 ± 12.7) | |
| Median (Average ± SD) |  |
| **Gender** |  |  |  |  |  |
| Female | 141 (29.7%) | 91.3% |  | 65 (34.6%) | 87.7% |
| Male | 333 (70.3%) | 88.9% |  | 123 (65.4%) | 94.3% |
| **ECOG PSa** |  |  |  |  |  |
| 0 | 402 (84.8%) | 91.7% |  | 149 (79.3%) | 95.3% |
| ≥1 | 72 (15.2%) | 75.4% |  | 39 (20.7%) | 79.5% |
| **Surgery** |  |  |  |  |  |
| Radical nephrectomy | 232 (48.9%) | 86.2% |  | 134 (71.3%) | 88.8% |
| Partial nephrectomy | 230 (48.5%) | 93.2% |  | 19 (10.1%) | 100.0% |
| Laparoscopic radical nephrectomy | 12 (2.5%) | 82.5% |  | 35 (18.6%) | 100.0% |
| **Tumor size, cm** | 4.0 (4.2 ± 2.4) | |  | 4.0 (4.5 ± 2.5) | |
| Median (Average ± SD) |  |
| **Pathological T stage** |  |  |  |  |  |
| pT1 | 330 (69.6%) | 94.4% |  | 153 (81.4%) | 95.4% |
| pT2 | 32 (6.8%) | 87.4% |  | 13 (6.9%) | 84.6% |
| pT3 | 105 (22.2%) | 78.9% |  | 17 (9.0%) | 70.6% |
| pT4 | 7 (1.5%) | 34.3% |  | 5 (2.7%) | 60.0% |
| **Fuhrman Grade** |  |  |  |  |  |
| 1 | 91 (19.2%) | 96.6% |  | 32 (17.0%) | 100.0% |
| 2 | 221 (46.6%) | 95.2% |  | 113 (60.1%) | 94.7% |
| 3 | 108 (22.8%) | 85.1% |  | 40 (21.3%) | 82.5% |
| 4 | 54 (11.4%) | 59.1% |  | 3 (1.6%) | 66.7% |
| **Coagulative necrosis** |  |  |  |  |  |
| Absent | 382 (80.6%) | 93.3% |  | 173 (92.0%) | 95.4% |
| Present | 92 (19.4%) | 72.7% |  | 15 (8.0%) | 53.3% |
| **UISS category** |  |  |  |  |  |
| Low risk | 219 (46.2%) | 97.2% |  | 104 (55.3%) | 98.1% |
| Mediate risk | 221 (46.6%) | 86.5% |  | 75 (39.9%) | 89.3% |
| High risk | 34 (7.2%) | 45.5% |  | 9 (4.8%) | 44.4% |
| ECOG PS, Eastern Cooperative Oncology Group performance status; UISS, UCLA Integrated Staging System | | | | | |
