# Supplementary material for: Tumor Infiltrating Mast Cells (TIMs) Confers a Marked Survival Advantage in Nonmetastatic Clear-Cell Renal Cell Carcinoma
Source: Springer Nature journal article supplement (doi:10.1245/s10434-016-5702-5), 2016-11-28
Supplement: MOESM3 [file 11102388]

| **Table S3. Univariate Cox regression analysis of clinical characteristic and mast cell density** | | | | | | | | | |
| --- | --- | --- | --- | --- | --- | --- | --- | --- | --- |
| **Characteristics** | **Cancer-specific Survival** | | | |  | **Relapse-free Survival** | | | |
| **Training cohort** | | **Validation cohort** | |  | **Training cohort** | | **Validation cohort** | |
| **HR (95% CI)** | **Pa** | **HR (95% CI)** | **Pa** |  | **HR (95% CI)** | **Pa** | **HR (95% CI)** | **Pa** |
| Age(year)b | 1.013(0.990-1.037) | 0.265 | 1.014(0.985-1.043) | 0.353 |  | 1.010(0.990-1.030) | 0.314 | 1.013(0.987-1.040) | 0.336 |
| Tumor size(cm) | 1.480(1.357-1.615) | **<0.001** | 1.177(1.090-1.270) | **<0.001** |  | 1.468(1.355-1.591) | **<0.001** | 1.157(1.073-1.247) | **<0.001** |
| gender (male vs female) | 1.325(0.695-2.528) | 0.395 | 0.634(0.309-1.301) | 0.634 |  | 1.141(0.667-1.953) | 0.632 | 0.764(0.389-1.499) | 0.436 |
| pT stage (3+4 vs 1+2) | 4.475(2.562-7.813) | **<0.001** | 7.326(3.502-15.328) | **<0.001** |  | 3.422(2.099-5.578) | **<0.001** | 5.628(2.788-11.358) | **<0.001** |
| Fuhrman grade |  | **<0.001** |  | **<0.001** |  |  | **<0.001** |  | **<0.001** |
| 3 vs 1+2 | 3.421(1.654-7.077) | **0.001** | 3.965(1.837-8.560) | **0.001** |  | 3.879(2.120-7.097) | **<0.001** | 4.161(2.063-8.392) | **<0.001** |
| 4 vs 1+2 | 13.983(7.173-27.260) | **<0.001** | 19.588(5.484-69.960) | **<0.001** |  | 13.103(7.299-23.522) | **<0.001** | 14.796(4.267-51.385) | **<0.001** |
| ECOG PS (>=1 vs 0) | 3.963(2.175-7.221) | **<0.001** | 2.255(1.059-4.803) | **0.036** |  | 3.935(2.317-6.683) | **<0.001** | 2.263(1.129-4.535) | **0.022** |
| Necrosis (present vs absent) | 4.713(2.702-8.219) | **<0.001** | 7.925(3.615-17.374) | **<0.001** |  | 4.485(2.763-7.269) | **<0.001** | 5.859(2.743-12.513) | **<0.001** |
| Mast cell density (/mm2)b | 0.963(0.947-0.980) | **<0.001** | 0.962(0.942-0.981) | **<0.001** |  | 0.969(0.956-0.983) | **<0.001** | 0.964(0.946-0.982) | **<0.001** |
| CI=confidence interval; ECOG PS = Eastern Cooperative Oncology Group performance status; a, p<0.05 is considered statistically significant.  b, calculated with continuous variable. | | | | | | | | | |
